# Supplementary material for: Identification of the flavivirus conserved residues in the envelope protein hinge region for the rational design of a candidate West Nile live-attenuated vaccine
Source: PubMed Central journal article supplement (PMC10628263; doi:10.1038/s41541-023-00765-0), 2023-11-06
Supplement: 41541_2023_765_MOESM1_ESM.pdf [file 41541_2023_765_MOESM1_ESM.pdf]

**Supplementary Table 1 Summary of SNVs >1% identified in the P0 stocks of WNV NY99ic and the respective mutants.**

| Virus      | Replicate | Genomic Position | Major Base | Variant Base | Genome Region | Residue Change | Frequency (%) |
|------------|-----------|------------------|------------|--------------|---------------|----------------|---------------|
| WNV NY99ic | 1         | 5166             | G          | A            | NS3           | -              | 2.1           |
|            |           | 10888            | U          | A            | 3'UTR         | -              | 1.3           |
|            | 2         | 414              | A          | C            | Capsid        | -              | 1.5           |
|            |           | 491              | A          | U            | prM           | K9M            | 23.7          |
|            |           | 546              | A          | G            | prM           | -              | 34.6          |
|            |           | 808              | A          | G            | prM           | T115A          | 3.1           |
|            |           | 2421             | U          | G            | E             | F485L          | 1.0           |
|            |           | 3061             | C          | G            | NS1           | L198V          | 7.3           |
|            |           | 3786             | A          | C            | NS2A          | -              | 5.1           |
|            |           | 5166             | G          | A            | NS3           | -              | 2.9           |
|            |           | 6203             | G          | A            | NS3           | R531K          | 1.0           |
|            |           | 8738             | A          | U            | NS5           | Q353L          | 11.8          |
|            |           | 9072             | C          | U            | NS5           | -              | 4.5           |
|            |           | 10888            | U          | A            | 3'UTR         | -              | 1.7           |
| E-A54S     | 1         | 5166             | G          | A            | NS3           | -              | 1.9           |
|            |           | 8077             | U          | C            | NS5           | F133L          | 13.6          |
|            | 2         | 2732             | U          | C            | NS1           | V88A           | 1.3           |
|            |           | 3612             | A          | G            | NS2A          | -              | 1.1           |
|            |           | 4483             | A          | G            | NS2B          | N89D           | 25.2          |
|            |           | 4690             | A          | U            | NS3           | T27S           | 1.1           |
|            |           | 5166             | G          | A            | NS3           | -              | 2.5           |
|            |           | 5997             | C          | U            | NS3           | -              | 5.2           |
| E-Y201P    | 1         | 546              | A          | G            | prM           | -              | 1.2           |
|            |           | 866              | A          | U            | prM           | Y134F          | 1.2           |
|            |           | 1920             | A          | U            | E             | -              | 1.1           |
|            |           | 1968             | A          | G            | E             | -              | 1.3           |
|            |           | 2313             | A          | C            | E             | -              | 2.9           |
|            |           | 3477             | A          | G            | NS1           | -              | 1.9           |
|            |           | 4920             | C          | U            | NS3           | -              | 2.6           |
|            |           | 4950             | A          | C            | NS3           | -              | 1.5           |
|            |           | 5166             | G          | A            | NS3           | -              | 1.4           |
|            |           | 5369             | A          | G            | NS3           | N253T          | 1.7           |
|            |           | 5917             | A          | G            | NS3           | T436A          | 1.3           |
|            |           | 6203             | G          | A            | NS3           | R531K          | 1.1           |
|            |           | 6634             | U          | C            | NS4A          | -              | 1.1           |
|            |           | 8352             | A          | C            | NS5           | -              | 1.1           |
|            |           | 10370            | C          | U            | NS5           | T897I          | 2.5           |
|            |           | 10421            | A          | C            | 3'UTR         | -              | 2.9           |
|            |           | 10913            | A          | C            | 3'UTR         | -              | 2.6           |
|            | 2         | 831              | A          | G            | prM           | -              | 2.9           |

|         |   |       |   |   |        |       |      |
|---------|---|-------|---|---|--------|-------|------|
|         |   | 1684  | A | G | E      | M240V | 1.3  |
|         |   | 2679  | A | G | NS1    | -     | 1.2  |
|         |   | 2745  | A | G | NS1    | -     | 3.5  |
|         |   | 3205  | A | G | NS1    | T246A | 3.2  |
|         |   | 4641  | A | G | NS3    | -     | 4.0  |
|         |   | 5166  | G | A | NS3    | -     | 1.7  |
|         |   | 5812  | G | A | NS3    | D401N | 1.3  |
|         |   | 6117  | A | U | NS3    | -     | 1.1  |
|         |   | 6203  | G | A | NS3    | R531K | 1.3  |
|         |   | 7662  | A | G | NS4B   | -     | 3.2  |
|         |   | 7777  | A | U | NS5    | I33F  | 1.2  |
|         |   | 7794  | A | C | NS5    | -     | 1.2  |
|         |   | 8361  | C | A | NS5    | -     | 1.6  |
|         |   | 8889  | A | G | NS5    | -     | 1.4  |
|         |   | 10769 | A | G | 3'UTR  | -     | 3.3  |
| E-A269S | 1 | 1774  | A | C | E      | I270L | 9.9  |
|         |   | 2982  | C | U | NS1    | -     | 9.5  |
|         |   | 5166  | G | A | NS3    | -     | 2.0  |
|         |   | 9126  | A | G | NS5    | -     | 1.0  |
|         | 2 | 406   | A | G | Capsid | K104E | 3.2  |
|         |   | 683   | C | U | prM    | A73V  | 1.7  |
|         |   | 710   | C | A | prM    | T82N  | 1.8  |
|         |   | 1162  | A | G | E      | S66G  | 2.3  |
|         |   | 2234  | A | G | E      | D423G | 2.7  |
|         |   | 2313  | A | C | E      | -     | 2.2  |
|         |   | 2679  | A | G | NS1    | -     | 1.1  |
|         |   | 4396  | A | C | NS2B   | I60L  | 3.2  |
|         |   | 4614  | A | C | NS3    | -     | 1.5  |
|         |   | 4965  | A | G | NS3    | -     | 1.9  |
|         |   | 5166  | G | A | NS3    | -     | 2.2  |
|         |   | 5250  | A | G | NS3    | I213M | 1.4  |
|         |   | 5346  | A | U | NS3    | -     | 1.2  |
|         |   | 5571  | A | C | NS3    | -     | 3.4  |
|         |   | 6912  | A | G | 2K     | -     | 1.7  |
|         |   | 6996  | C | U | NS4B   | -     | 5.5  |
|         |   | 7707  | A | G | NS5    | -     | 2.4  |
|         |   | 8523  | C | A | NS5    | N281K | 1.4  |
|         |   | 9637  | U | A | NS5    | F653I | 2.0  |
|         |   | 10306 | A | C | NS5    | -     | 2.7  |
|         |   | 10408 | C | U | 3'UTR  | -     | 2.1  |
|         |   | 10650 | A | G | 3'UTR  | -     | 1.5  |
|         |   | 10740 | A | C | 3'UTR  | -     | 1.0  |
|         |   | 10750 | C | U | 3'UTR  | -     | 1.4  |
|         |   | 10778 | A | G | 3'UTR  | -     | 4.4  |
| E-V272T | 1 | 217   | A | C | Capsid | K41Q  | 14.3 |

|         |   |       |   |   |        |       |      |
|---------|---|-------|---|---|--------|-------|------|
|         |   | 1907  | C | U | E      | T314I | 1.6  |
|         |   | 2052  | U | C | E      | -     | 2.3  |
|         |   | 2581  | A | G | NS1    | T38A  | 14.4 |
|         |   | 4238  | U | C | NS2B   | V7A   | 3.7  |
|         |   | 5166  | G | A | NS3    | -     | 2.1  |
|         |   | 7626  | U | C | NS4B   | -     | 2.0  |
|         |   | 10888 | U | A | 3'UTR  | -     | 1.1  |
|         | 2 | 106   | A | G | Capsid | K4E   | 1.4  |
|         |   | 287   | C | A | Capsid | A64E  | 3.9  |
|         |   | 913   | A | C | prM    | M150L | 5.3  |
|         |   | 1311  | A | C | E      | -     | 1.9  |
|         |   | 1800  | U | C | E      | -     | 2.3  |
|         |   | 2427  | A | C | E      | -     | 1.8  |
|         |   | 3593  | C | G | NS2A   | L24V  | 4.6  |
|         |   | 3677  | A | G | NS2A   | Y51C  | 6.0  |
|         |   | 4497  | A | C | NS2B   | -     | 5.4  |
|         |   | 5166  | G | A | NS3    | -     | 1.8  |
|         |   | 6263  | U | C | NS3    | V551A | 1.1  |
|         |   | 7420  | A | C | NS4B   | M169L | 14.0 |
|         |   | 8164  | A | G | NS5    | I162V | 3.4  |
|         |   | 9628  | A | U | NS5    | T650S | 1.0  |
|         |   | 9660  | C | A | NS5    | -     | 1.5  |
|         |   | 9861  | A | G | NS5    | -     | 2.8  |
|         |   | 10350 | A | C | NS5    | -     | 3.3  |
|         |   | 10888 | U | A | 3'UTR  | -     | 1.8  |
| E-L281N | 1 | 4292  | A | C | NS2B   | D25A  | 1.2  |
|         |   | 4481  | U | C | NS2B   | M88T  | 5.4  |
|         |   | 4719  | A | U | NS3    | -     | 15.1 |
|         |   | 5166  | G | A | NS3    | -     | 2.0  |
|         |   | 5325  | A | G | NS3    | -     | 13.0 |
|         |   | 8457  | C | U | NS5    | -     | 1.4  |
|         |   | 8769  | G | A | NS5    | -     | 7.0  |
|         |   | 10888 | U | A | 3'UTR  | -     | 1.5  |
|         | 2 | 2222  | C | U | E      | A419V | 2.3  |
|         |   | 3961  | A | C | NS2A   | I146L | 34.7 |
|         |   | 3964  | A | C | NS2A   | T147P | 6.4  |
|         |   | 5166  | G | A | NS3    | -     | 1.9  |
|         |   | 5938  | A | G | NS3    | I443V | 2.0  |
|         |   | 6646  | U | C | NS4A   | -     | 1.0  |
|         |   | 9724  | U | G | NS5    | S682A | 5.5  |
|         |   | 10888 | U | A | 3'UTR  | -     | 1.3  |

---

**Supplementary Table 2 Summary of SNVs >1% identified in the P1 stock of WNV NY99ic and the respective mutants.**

| Virus         | Repeat | Genomic Position | Major Base | Variant Base | Gene Region | Residue Change | Frequency (%) |
|---------------|--------|------------------|------------|--------------|-------------|----------------|---------------|
| WNV<br>NY99ic | 1      | 414              | A          | C            | Capsid      | -              | 1.6           |
|               |        | 491              | A          | U            | prM         | K9M            | 28.7          |
|               |        | 546              | A          | G            | prM         | -              | 38.9          |
|               |        | 808              | A          | G            | prM         | T115A          | 5.2           |
|               |        | 3061             | C          | G            | NS1         | L198N          | 6.9           |
|               |        | 3786             | A          | C            | NS2A        | -              | 4.7           |
|               |        | 5116             | G          | A            | NS3         | -              | 1.5           |
|               |        | 6203             | G          | A            | NS3         | R531K          | 1.1           |
|               |        | 8738             | A          | U            | NS5         | Q353L          | 3.1           |
|               | 9072   | C                | U          | NS5          | -           | 4.5            |               |
|               | 2      | 638              | C          | G            | prM         | A58G           | 1.4           |
|               |        | 1274             | A          | C            | E           | N103T          | 2.8           |
|               |        | 1708             | A          | U            | E           | T248S          | 1.1           |
|               |        | 1863             | A          | G            | E           | -              | 1.4           |
|               |        | 5166             | G          | A            | NS3         | -              | 1.7           |
| 6203          |        | G                | A          | NS3          | R531K       | 1.4            |               |
| 9584          |        | A                | G          | NS5          | N103T       | 2.1            |               |
| E-A54S        | 1      | 5166             | G          | A            | NS3         | -              | 1.4           |
|               |        | 6203             | G          | A            | NS3         | R531K          | 1.0           |
|               |        | 8077             | U          | C            | NS5         | F133L          | 7.9           |
|               | 2      | 4483             | A          | G            | NS2B        | N89D           | 21.0          |
|               |        | 5166             | G          | A            | NS3         | -              | 1.6           |
|               |        | 5997             | C          | U            | NS3         | -              | 5.1           |
| E-Y201P       | 1      | 866              | A          | U            | prM         | Y134F          | 1.3           |
|               |        | 1568             | C          | A            | E           | P201H          | 2.9           |
|               |        | 1920             | A          | U            | E           | -              | 1.4           |
|               |        | 2145             | C          | A            | E           | -              | 1.2           |
|               |        | 2313             | A          | C            | E           | -              | 2.9           |
|               |        | 3477             | A          | G            | NS1         | -              | 2.4           |
|               |        | 4920             | C          | U            | NS3         | -              | 2.7           |
|               |        | 4950             | A          | C            | NS3         | -              | 1.3           |
|               |        | 5166             | G          | A            | NS3         | -              | 1.7           |
|               |        | 5369             | A          | G            | NS3         | N253S          | 1.2           |
|               |        | 6203             | G          | A            | NS3         | R531K          | 1.1           |
|               |        | 6321             | A          | C            | NS3         | -              | 1.1           |
|               |        | 8815             | A          | G            | NS5         | T379A          | 1.1           |
|               |        | 10370            | C          | U            | NS5         | T897I          | 2.4           |
|               |        | 10421            | A          | C            | 3'UTR       | -              | 1.9           |
| 10833         | A      | G                | 3'UTR      | -            | 2.4         |                |               |

|          |   |       |   |   |        |       |     |
|----------|---|-------|---|---|--------|-------|-----|
|          |   | 10913 | A | C | 3'UTR  | -     | 2.3 |
|          | 2 | 831   | A | G | prM    | -     | 2.5 |
|          |   | 1568  | C | U | E      | P201L | 9.6 |
|          |   | 1568  | C | A | E      | P201H | 8.0 |
|          |   | 1684  | A | G | E      | M240V | 6.9 |
|          |   | 2679  | A | G | NS1    | -     | 1.4 |
|          |   | 2745  | A | G | NS1    | -     | 3.2 |
|          |   | 2858  | A | G | NS1    | N130S | 5.5 |
|          |   | 2991  | C | U | NS1    | -     | 3.6 |
|          |   | 3205  | A | G | NS1    | T246A | 2.1 |
|          |   | 4641  | A | G | NS3    | -     | 4.1 |
|          |   | 5166  | G | A | NS3    | -     | 1.8 |
|          |   | 5812  | G | A | NS3    | D401N | 1.5 |
|          |   | 7662  | A | G | NS4B   | -     | 5.4 |
|          |   | 8356  | U | A | NS5    | S226T | 1.4 |
|          |   | 8361  | C | A | NS5    | -     | 1.3 |
|          |   | 8889  | A | G | NS5    | -     | 2.0 |
|          |   | 10769 | A | G | 3'UTR  | -     | 2.3 |
| E- A269S | 1 | 1774  | A | C | E      | I270L | 9.2 |
|          |   | 2982  | C | U | NS1    | -     | 9.3 |
|          |   | 5166  | G | A | NS3    | -     | 1.4 |
|          |   | 6203  | G | A | NS3    | R531K | 1.1 |
|          | 2 | 406   | A | G | Capsid | K104E | 2.5 |
|          |   | 683   | C | U | prM    | A73V  | 1.6 |
|          |   | 1162  | A | G | E      | S66G  | 2.3 |
|          |   | 1491  | A | C | E      | -     | 1.2 |
|          |   | 2234  | A | G | E      | D423G | 1.2 |
|          |   | 2313  | A | C | E      | -     | 2.6 |
|          |   | 2679  | A | G | NS1    | -     | 1.3 |
|          |   | 4396  | A | C | NS2B   | I60L  | 3.5 |
|          |   | 4614  | A | C | NS3    | -     | 1.1 |
|          |   | 4965  | A | G | NS3    | -     | 3.5 |
|          |   | 5166  | G | A | NS3    | -     | 1.4 |
|          |   | 5250  | A | G | NS3    | I213M | 1.3 |
|          |   | 5346  | A | U | NS3    | -     | 1.1 |
|          |   | 5571  | A | C | NS3    | -     | 3.8 |
|          |   | 6203  | G | A | NS3    | R531K | 1.5 |
|          |   | 6912  | A | G | 2K     | -     | 2.1 |
|          |   | 6996  | C | U | NS4B   | -     | 5.0 |
|          |   | 7707  | A | G | SN5    | -     | 1.8 |
|          |   | 8523  | C | A | NS5    | N281K | 1.8 |
|          |   | 9637  | U | A | NS5    | F653I | 2.9 |
|          |   | 10306 | A | C | NS5    | -     | 2.7 |
|          |   | 10369 | A | C | NS5    | T897P | 1.4 |
|          |   | 10408 | C | U | 3'UTR  | -     | 1.6 |

|         |   |       |   |   |        |       |      |
|---------|---|-------|---|---|--------|-------|------|
|         |   | 10650 | A | G | 3'UTR  | -     | 1.3  |
|         |   | 10740 | A | C | 3'UTR  | -     | 1.1  |
|         |   | 10778 | A | G | 3'UTR  | -     | 5.7  |
| E-V272T | 1 | 217   | A | C | Capsid | K41Q  | 11.0 |
|         |   | 1907  | C | U | E      | T341I | 1.7  |
|         |   | 2052  | U | C | E      | -     | 2.3  |
|         |   | 2581  | A | G | NS1    | T38A  | 10.0 |
|         |   | 4238  | U | C | NS2B   | V7A   | 3.5  |
|         |   | 5166  | G | A | NS3    | -     | 1.3  |
|         |   | 6203  | G | A | NS3    | R531K | 1.3  |
|         |   | 7626  | U | C | NS4B   | -     | 2.3  |
|         | 2 | 106   | A | G | Capsid | K4E   | 1.9  |
|         |   | 287   | C | A | Capsid | A64E  | 4.2  |
|         |   | 913   | A | C | prM    | M150L | 5.8  |
|         |   | 1311  | A | C | E      | -     | 2.2  |
|         |   | 1800  | U | C | E      | -     | 3.2  |
|         |   | 2427  | A | C | E      | -     | 1.5  |
|         |   | 3595  | C | G | NS2A   | L24V  | 2.7  |
|         |   | 3677  | A | G | NS2A   | Y51C  | 2.6  |
|         |   | 4497  | A | C | SN2B   | -     | 4.1  |
|         |   | 5166  | G | A | NS3    | -     | 1.6  |
|         |   | 6203  | G | A | NS3    | R531K | 1.2  |
|         |   | 6263  | U | C | NS3    | V551A | 1.6  |
|         |   | 7420  | A | C | NS4B   | M169L | 16.0 |
|         |   | 8164  | A | G | NS5    | I162V | 3.6  |
|         |   | 9628  | A | U | NS5    | T650S | 1.7  |
|         |   | 9660  | C | A | NS5    | -     | 1.5  |
|         |   | 9861  | A | G | NS5    | -     | 3.5  |
|         |   | 10350 | A | C | NS5    | -     | 2.4  |
| E-L281N | 1 | 4481  | U | C | NS2B   | M88T  | 4.4  |
|         |   | 4719  | A | U | NS3    | -     | 14.4 |
|         |   | 5166  | G | A | NS3    | -     | 1.2  |
|         |   | 5325  | A | G | NS3    | -     | 14.2 |
|         |   | 6203  | G | A | NS3    | R531K | 1.0  |
|         |   | 8457  | C | U | NS5    | -     | 1.6  |
|         |   | 8769  | G | A | NS5    | -     | 6.4  |
|         | 2 | 2222  | C | U | E      | A419V | 3.2  |
|         |   | 3961  | A | C | NS2A   | I146L | 36.5 |
|         |   | 3964  | A | C | NS2A   | T147P | 1.3  |
|         |   | 5166  | G | A | NS3    | -     | 1.0  |
|         |   | 5938  | A | G | NS3    | I443V | 1.3  |
|         |   | 6203  | G | A | NS3    | R531K | 1.3  |
|         |   | 6646  | U | C | NS4A   | -     | 1.4  |
|         |   | 9724  | U | G | NS5    | S682A | 1.3  |

**Supplementary Table 3 Summary of SNVs >1% identified in the P0 stock of E-A54I and E-A54E mutants in comparison with WNV NY99ic control rescued simultaneously.**

| Virus      | Repeat | Genomic Position | Reference Base | Variant Base | Gene Region | Amino Acid Change | Variant Frequency (%) |
|------------|--------|------------------|----------------|--------------|-------------|-------------------|-----------------------|
| WNV NY99ic | 1      | 417              | A              | G            | C           | -                 | 5.0                   |
|            |        | 1527             | A              | C            | E           | -                 | 7.6                   |
|            |        | 1955             | C              | T            | E           | T330I             | 1.2                   |
|            |        | 2502             | A              | G            | NS1         | -                 | 17.8                  |
|            |        | 5166             | G              | A            | NS3         | -                 | 2.3                   |
|            |        | 6165             | T              | C            | NS3         | -                 | 3.3                   |
|            |        | 9195             | A              | T            | NS5         | -                 | 5.3                   |
|            |        | 10178            | C              | T            | NS5         | T833I             | 1.9                   |
|            |        | 10524            | C              | A            | 3'UTR       | -                 | 1.6                   |
|            |        | 10888            | T              | A            | 3'UTR       | -                 | 1.9                   |
|            | 2      | 738              | G              | C            | prM         | -                 | 1.9                   |
|            |        | 744              | A              | G            | prM         | -                 | 2.3                   |
|            |        | 1561             | A              | T            | E           | N199Y             | 2.5                   |
|            |        | 2182             | A              | G            | E           | K406E             | 9.0                   |
|            |        | 2184             | A              | G            | E           | -                 | 6.6                   |
|            |        | 4509             | A              | C            | NS2B        | -                 | 4.7                   |
|            |        | 5166             | G              | A            | NS3         | -                 | 2.7                   |
|            |        | 7403             | A              | G            | NS4B        | E163G             | 1.0                   |
|            |        | 8953             | A              | C            | NS5         | -                 | 11.1                  |
|            |        | 9612             | A              | G            | NS5         | -                 | 11.7                  |
| 10888      | T      | A                | 3'UTR          | -            | 2.3         |                   |                       |
| E-A54I     | 1      | 2618             | A              | C            | NS1         | H50P              | 18.6                  |
|            |        | 2847             | A              | T            | NS1         | -                 | 4.7                   |
|            |        | 5166             | G              | A            | NS3         | -                 | 2.5                   |
|            |        | 6462             | A              | G            | NS3         | -                 | 1.9                   |
|            |        | 7341             | G              | A            | NS4B        | -                 | 3.1                   |
|            | 2      | 5166             | G              | A            | NS3         | -                 | 2.7                   |
|            |        | 8415             | A              | G            | NS5         | -                 | 18.6                  |
|            |        | 10161            | A              | G            | NS5         | -                 | 5.2                   |
|            |        | 10888            | T              | A            | 3'UTR       | -                 | 4.2                   |
| E-A54E     | 1      | 1336             | A              | C            | E           | K124Q             | 1.7                   |
|            |        | 1621             | A              | C            | E           | M219L             | 2.7                   |
|            |        | 1804             | A              | G            | E           | K280E             | 6.9                   |
|            |        | 2754             | A              | C            | NS1         | -                 | 2.3                   |
|            |        | 5084             | A              | G            | NS3         | N158S             | 1.9                   |
|            |        | 5166             | G              | A            | NS3         | -                 | 2.3                   |
|            |        | 6203             | G              | A            | NS3         | R531K             | 1.2                   |
|            |        | 7411             | A              | T            | NS4B        | T166S             | 3.6                   |

|   |      |   |   |      |       |      |
|---|------|---|---|------|-------|------|
|   | 7461 | T | C | NS4B | -     | 1.2  |
|   | 7695 | A | G | NS5  | -     | 2.3  |
|   | 8513 | A | G | NS5  | K278R | 11.2 |
| 2 | 1403 | C | G | E    | P146R | 1.0  |
|   | 4009 | C | T | NS2A | -     | 1.1  |
|   | 5166 | G | A | NS3  | -     | 2.3  |
|   | 5414 | A | T | NS3  | H268L | 2.7  |
|   | 5586 | A | C | NS3  | -     | 3.5  |
|   | 5958 | A | G | NS3  | -     | 6.2  |
|   | 6462 | A | G | NS3  | -     | 7.5  |
|   | 6971 | A | C | NS4B | Q19P  | 1.0  |
|   | 9894 | A | T | NS5  | E738D | 2.1  |

---



**Supplementary Table 4 Summary of SNVs >1% identified in the P1 stock of E-A54I and E-A54E mutants.**

| Virus  | Repeat | Genomic Position | Reference Base | Variant Base | Gene Region | Amino Acid Change | Variant Frequency (%) |
|--------|--------|------------------|----------------|--------------|-------------|-------------------|-----------------------|
| E-A54I | 1      | 2618             | A              | C            | NS1         | H50P              | 16.5                  |
|        |        | 2847             | A              | T            | NS1         | -                 | 3.5                   |
|        |        | 5166             | G              | A            | NS3         | -                 | 2.7                   |
|        |        | 6203             | G              | A            | NS3         | R531K             | 1.3                   |
|        |        | 6462             | A              | G            | NS3         | -                 | 4.2                   |
|        |        | 7341             | G              | A            | NS4B        | -                 | 3.9                   |
|        |        | 10888            | T              | A            | 3'UTR       | -                 | 1.3                   |
|        | 2      | 55               | C              | T            | 5'UTR       | -                 | 1.1                   |
|        |        | 5166             | G              | A            | NS3         | -                 | 2.5                   |
|        |        | 6162             | A              | G            | NS3         | -                 | 1.1                   |
|        |        | 8077             | T              | C            | NS5         | F133L             | 1.3                   |
|        |        | 8415             | A              | G            | NS5         | -                 | 14.9                  |
|        |        | 8447             | A              | G            | NS5         | E256G             | 2.7                   |
|        |        | 8833             | G              | A            | NS5         | A385T             | 4.9                   |
|        |        | 10260            | C              | T            | NS5         | -                 | 3.5                   |
|        |        | 10815            | G              | T            | 3'UTR       | -                 | 2.2                   |
|        |        | 10888            | T              | A            | 3'UTR       | -                 | 1.7                   |
| E-A54E | 1      | 50               | A              | G            | 5'UTR       | -                 | 1.3                   |
|        |        | 1804             | A              | G            | E           | K280E             | 3.5                   |
|        |        | 1876             | G              | C            | E           | V304L             | 1                     |
|        |        | 1877             | T              | A            | E           | V304D             | 1                     |
|        |        | 2754             | A              | C            | NS1         | -                 | 8.4                   |
|        |        | 5166             | G              | A            | NS3         | -                 | 2.5                   |
|        |        | 7461             | T              | C            | NS4B        | -                 | 13.3                  |
|        |        | 7695             | A              | G            | NS5         | -                 | 6.7                   |
|        |        | 8513             | A              | G            | NS5         | K278R             | 16.9                  |
|        |        | 10852            | C              | T            | 3'UTR       | -                 | 8.1                   |
|        | 2      | 10888            | T              | A            | 3'UTR       | -                 | 2.6                   |
|        |        | 175              | T              | C            | C           | -                 | 2.4                   |
|        |        | 272              | T              | C            | C           | I59T              | 2.3                   |
|        |        | 833              | A              | G            | prM         | K123R             | 1.2                   |
|        |        | 1558             | A              | G            | E           | T198A             | 1.8                   |
|        |        | 3288             | A              | G            | NS1         | -                 | 7.9                   |
|        |        | 3871             | A              | T            | NS2A        | M116L             | 1.9                   |
|        |        | 5166             | G              | A            | NS3         | -                 | 3.1                   |
|        |        | 5367             | T              | C            | NS3         | -                 | 1.6                   |
|        |        | 5414             | A              | T            | NS3         | H268L             | 3.2                   |
| 5586   | A      | C                | NS3            | -            | 8.4         |                   |                       |
| 5958   | A      | G                | NS3            | -            | 6.2         |                   |                       |
| 6152   | G      | A                | NS3            | N498K        | 2.8         |                   |                       |

|       |   |   |       |       |     |
|-------|---|---|-------|-------|-----|
| 6165  | T | C | NS3   | N503H | 6.8 |
| 6462  | A | G | NS3   | -     | 6.9 |
| 7777  | A | C | NS5   | N17T  | 1.1 |
| 7848  | T | C | NS5   | -     | 3   |
| 9894  | A | T | NS5   | E738D | 1.2 |
| 10415 | A | T | NS5   | -     | 3.3 |
| 10888 | T | A | 3'UTR | -     | 2.7 |

---
